# Supplementary material
Source: Springer Nature journal article supplement (https://www.springermedizin.de/resource/supplementary/12939_2011_268_MOESM1_ESM.pdf/9550708)

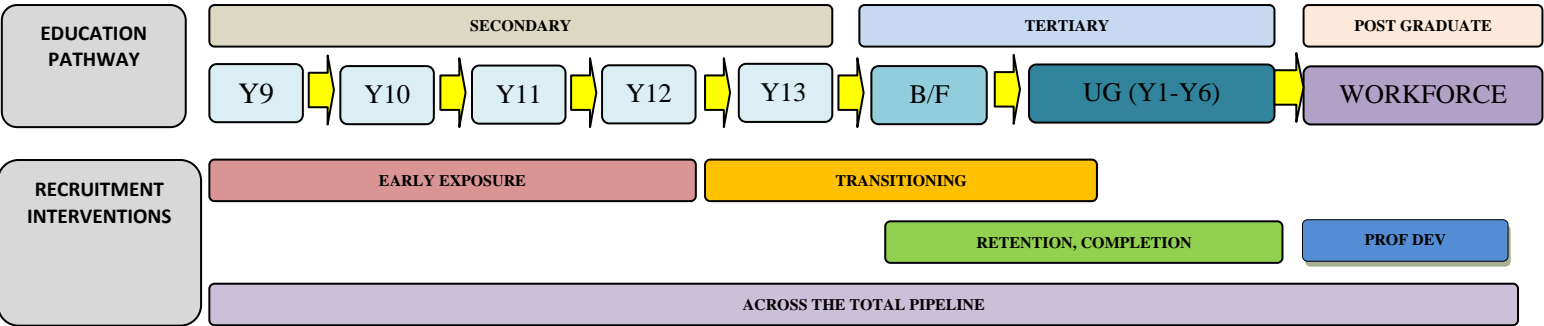

Supplement: MOESM1 [file 9550708]
